# Supplementary material for: Novel QTL Associated with Shoot Branching Identified in Doubled Haploid Rice (Oryza sativa L.) under Low Nitrogen Cultivation
Source: MDPI journal article supplement (doi:10.3390/genes12050745), 2021-05-14
Supplement: s1 [file s1]

# Novel QTL Associated with Shoot Branching Identified in Doubled Haploid Rice (*Oryza sativa* L.) under Low Nitrogen Cultivation

Youngho Kwon <sup>†</sup>, Nkulu Rolly Kabange <sup>†</sup>, Ji-Yun Lee, So-Myeong Lee, Jin-Kyung Cha, Dongjin Shin, Jun-Hyeon Cho, Ju-Won Kang, Jong-Min Ko, and Jong-Hee Lee <sup>\*</sup>

<sup>1</sup> Department of Southern Area Crop Science, National Institute of Crop Science, RDA, Miryang 50424, Korea; kwon6344@korea.kr (Y.H.); olivetti90@korea.kr (S.-M.L.); minitia@korea.kr (J.-Y.L.); jknzz5@korea.kr (J.-K.C.); jacob1223@korea.kr (D.S.); hy4779@korea.kr (J.-H.C.); kangjw81@korea.kr (J.-W.K.); kojmin@korea.kr (J.-M.K.);

<sup>\*</sup> Correspondence: Jong-Hee Lee, ccrljh@korea.kr, Tel.: +82-53-350-1168, Fax: +82-55-352-3059

<sup>†</sup> These authors contributed equally to this work as first authors

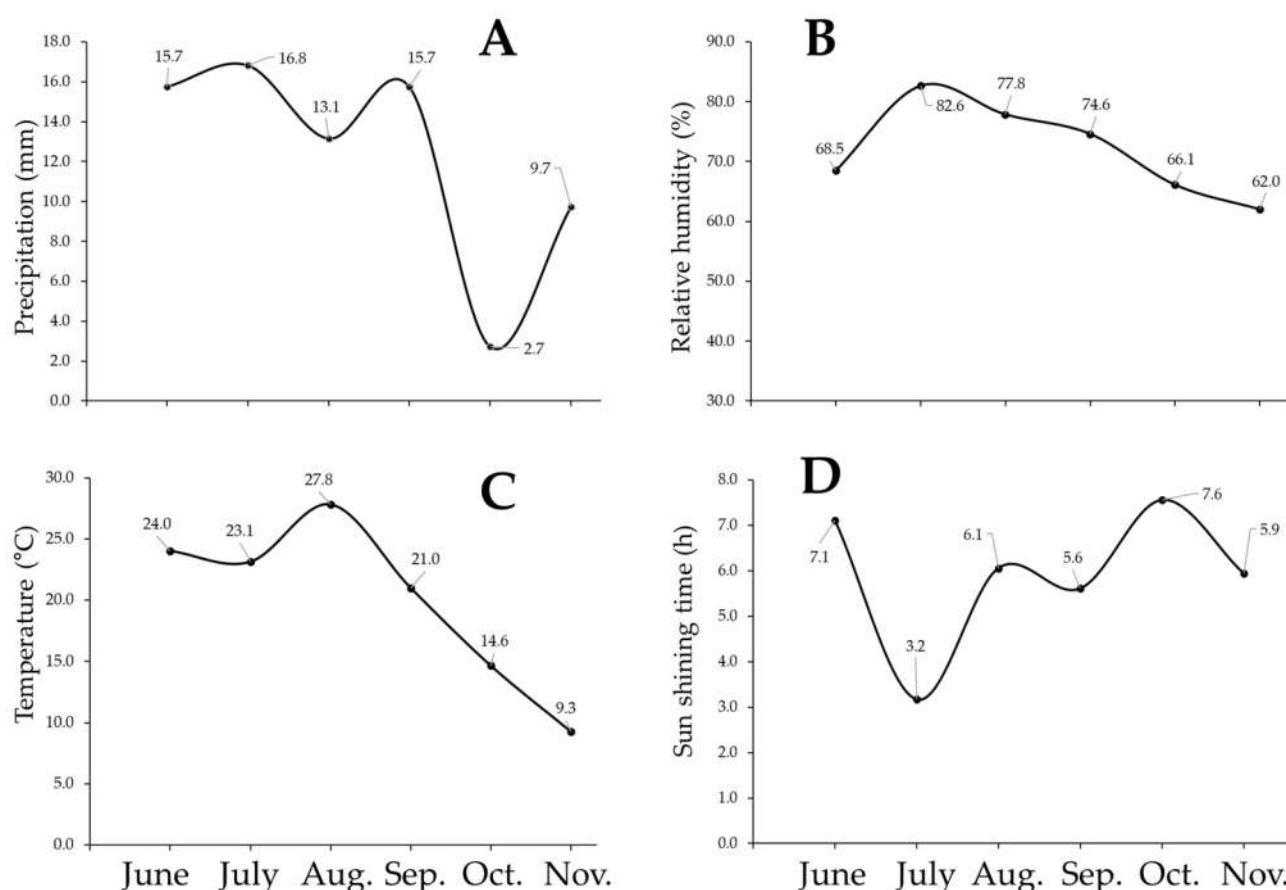

**Figure S1.** Changes in weather parameters during the rice cropping season of 2020. (A) Monthly average precipitation (in mm), (B) Monthly average relative humidity (RH), (C) Changes in temperature, and (D) Pattern of the duration of sun shining (in hours). Data are monthly mean value, obtained from the virtual database of the Korean Meteorological Agency (KMA) (<https://data.kma.go.kr>).

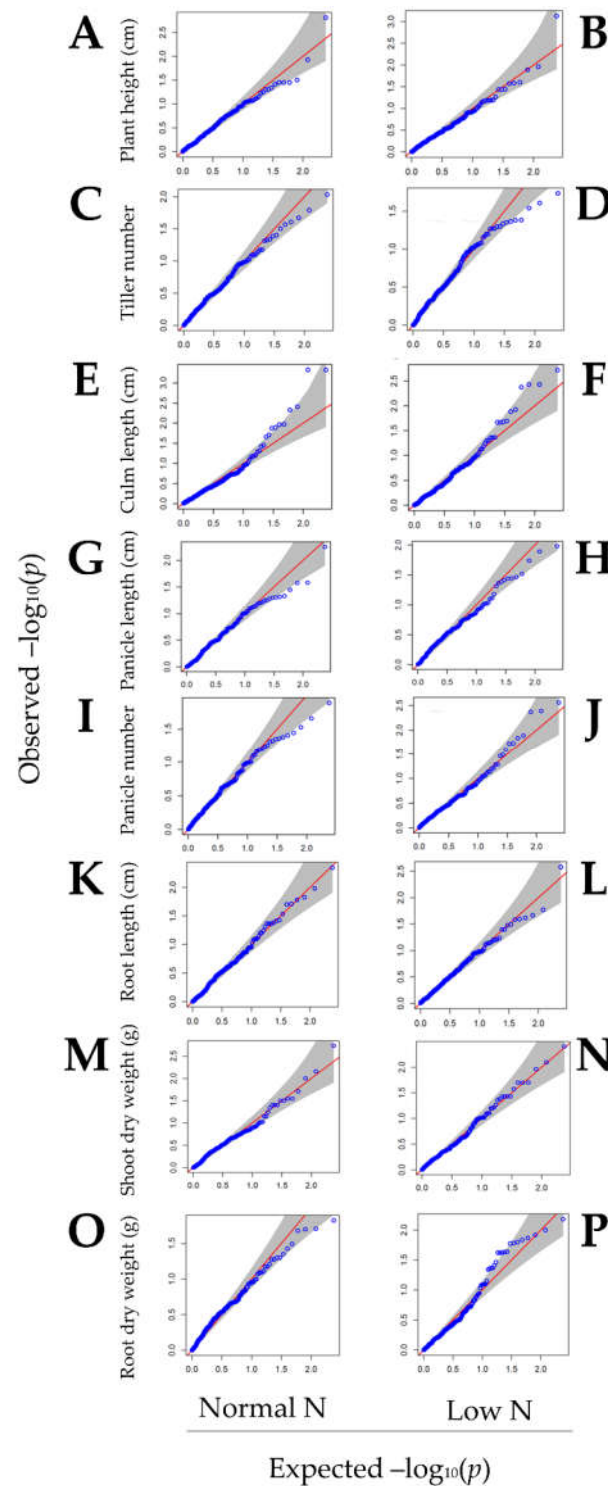

**Figure S2.** Quantile–Quantile plots. Quantile–Quantile (Q–Q) plots for plant height (A,B) and number of tillers under normal (C,D), culm length (E,F), panicle length (G,H), panicle number (I,J), root length (K,L), shoot (M,N) and root (O,P) dry weights under normal and low N cultivation conditions.  $-\log_{10}(p)$  is the logarithm base 10 quantile–quantile (Q–Q) of the  $p$ -values (expected and observed) for traits.

**Table S1.** Person r correlation between traits under normal nitrogen cultivation

|      | PHN                  | TNN                 | CLN                  | PLN                  | PNN                  | RLN                  | SDWN                 | RDWN                 |
|------|----------------------|---------------------|----------------------|----------------------|----------------------|----------------------|----------------------|----------------------|
| PHN  |                      | -0.465***           | 0.150 <sup>ns</sup>  | 0.149 <sup>ns</sup>  | -0.437***            | 0.000 <sup>ns</sup>  | 0.350***             | -0.027 <sup>ns</sup> |
| TNN  | -0.465***            |                     | 0.085 <sup>ns</sup>  | -0.199*              | 0.603***             | 0.046 <sup>ns</sup>  | 0.317***             | 0.173 <sup>ns</sup>  |
| CLN  | 0.150 <sup>ns</sup>  | 0.085 <sup>ns</sup> |                      | 0.299***             | -0.052 <sup>ns</sup> | 0.033 <sup>ns</sup>  | -0.005 <sup>ns</sup> | 0.081 <sup>ns</sup>  |
| PLN  | 0.149 <sup>ns</sup>  | -0.199*             | 0.299***             |                      | -0.343***            | -0.033 <sup>ns</sup> | -0.088 <sup>ns</sup> | 0.059 <sup>ns</sup>  |
| PNN  | -0.437***            | 0.603***            | -0.052 <sup>ns</sup> | -0.343***            |                      | -0.161 <sup>ns</sup> | 0.109 <sup>ns</sup>  | -0.083 <sup>ns</sup> |
| RLN  | 0.000 <sup>ns</sup>  | 0.046 <sup>ns</sup> | 0.033 <sup>ns</sup>  | -0.033 <sup>ns</sup> | -0.161 <sup>ns</sup> |                      | -0.117 <sup>ns</sup> | 0.209*               |
| SDWN | 0.350***             | 0.317***            | -0.005 <sup>ns</sup> | -0.088 <sup>ns</sup> | 0.109 <sup>ns</sup>  | -0.117 <sup>ns</sup> |                      | 0.309***             |
| RDWN | -0.027 <sup>ns</sup> | 0.173 <sup>ns</sup> | 0.081 <sup>ns</sup>  | 0.059 <sup>ns</sup>  | -0.083 <sup>ns</sup> | 0.209*               | 0.309***             |                      |

**Table S2.** Person r correlation between traits under low nitrogen cultivation

|      | PHL                 | TNL                  | CLL                  | PLL                  | PNL                  | RLL                  | SDWL                 | RDWL                 |
|------|---------------------|----------------------|----------------------|----------------------|----------------------|----------------------|----------------------|----------------------|
| PHL  |                     | -0.279**             | 0.179 <sup>ns</sup>  | 0.071 <sup>ns</sup>  | -0.413***            | 0.074 <sup>ns</sup>  | 0.374***             | 0.009 <sup>ns</sup>  |
| TNL  | -0.279**            |                      | 0.198*               | -0.222*              | 0.560***             | 0.003 <sup>ns</sup>  | 0.583***             | 0.288**              |
| CLL  | 0.179 <sup>ns</sup> | 0.198 <sup>ns</sup>  |                      | -0.005 <sup>ns</sup> | -0.058 <sup>ns</sup> | 0.068 <sup>ns</sup>  | 0.263**              | 0.167 <sup>ns</sup>  |
| PLL  | 0.071 <sup>ns</sup> | -0.222 <sup>ns</sup> | -0.005 <sup>ns</sup> |                      | -0.343***            | -0.009 <sup>ns</sup> | -0.140 <sup>ns</sup> | 0.043 <sup>ns</sup>  |
| PNL  | -0.413***           | 0.560***             | -0.058 <sup>ns</sup> | -0.343***            |                      | -0.066 <sup>ns</sup> | 0.126 <sup>ns</sup>  | -0.091 <sup>ns</sup> |
| RLL  | 0.074 <sup>ns</sup> | 0.003 <sup>ns</sup>  | 0.068 <sup>ns</sup>  | -0.009 <sup>ns</sup> | -0.066 <sup>ns</sup> |                      | 0.238**              | 0.440***             |
| SDWL | 0.374***            | 0.583***             | 0.263**              | -0.140 <sup>ns</sup> | 0.126 <sup>ns</sup>  | 0.238**              |                      | 0.491***             |
| RDWL | 0.009 <sup>ns</sup> | 0.288**              | 0.167 <sup>ns</sup>  | 0.043 <sup>ns</sup>  | -0.091 <sup>ns</sup> | 0.440***             | 0.491***             |                      |

Plant height under normal nitrogen cultivation (PHN), tiller number under low nitrogen availability (TNL), tiller number under normal nitrogen availability (TNN), culm length under low nitrogen level (CLL), culm length under normal nitrogen level (CNN), panicle length under normal nitrogen cultivation (PLN), panicle number under low nitrogen level (PNL), panicle number under normal nitrogen cultivation (PNN), root length under low nitrogen level (RLL), shoot dry weight under normal nitrogen cultivation (SDWN), and root dry weight under normal nitrogen cultivation (RDWN). \* $p < 0.05$ , \*\* $p < 0.01$ , \*\*\* $p < 0.001$ , <sup>ns</sup> non-significant.

**Table S3.** Shapiro Wilk W-statistic for the test of normality of the distribution

| No. | Trait name | Sample Size | Mean  | Variance | S.E  | Skewness | Kurtosis | Min.  | Max.  | Range | P-value |
|-----|------------|-------------|-------|----------|------|----------|----------|-------|-------|-------|---------|
| 1   | PHL        | 117         | 53.15 | 32.11    | 5.67 | −0.09    | −0.17    | 40    | 67.9  | 27.9  | 0.568   |
| 2   | PHN        | 117         | 52.5  | 33.87    | 5.82 | −0.06    | −0.47    | 38.7  | 65.4  | 26.7  | 0.234   |
| 3   | TNL        | 117         | 15.47 | 15.85    | 3.98 | 0.72     | 0.08     | 7.7   | 28    | 20.3  | 0.001   |
| 4   | TNN        | 117         | 15.38 | 13.41    | 3.66 | 0.96     | 1.10     | 8.3   | 28.3  | 20    | 0.000   |
| 5   | CLL        | 117         | 65.06 | 46.17    | 6.79 | −0.19    | 0.02     | 48    | 80    | 32    | 0.166   |
| 6   | CLN        | 117         | 64.84 | 47.41    | 6.89 | 0.21     | 0.26     | 50.08 | 86.82 | 36.74 | 0.450   |
| 7   | PLL        | 117         | 22.16 | 4.68     | 2.16 | 0.35     | 0.23     | 16.4  | 28.6  | 12.2  | 0.456   |
| 8   | PLN        | 117         | 21.97 | 4.68     | 2.16 | 0.48     | 0.60     | 17.46 | 29.7  | 12.24 | 0.268   |
| 9   | PNL        | 117         | 10.19 | 11.07    | 3.33 | 1.44     | 3.18     | 4     | 25    | 21    | 0.000   |
| 10  | PNN        | 117         | 10.2  | 2.63     | 1.62 | 0.07     | 0.05     | 6.2   | 14.3  | 8.1   | 0.500   |
| 11  | RLL        | 117         | 19.99 | 9.44     | 3.07 | 0.01     | −0.56    | 12.9  | 26.1  | 13.2  | 0.078   |
| 12  | RLN        | 117         | 20.74 | 6.18     | 2.49 | 0.04     | 0.27     | 14    | 28.5  | 14.5  | 0.904   |
| 13  | SDWL       | 117         | 7.143 | 2.53     | 1.59 | 0.47     | 0.05     | 3.7   | 11.6  | 7.9   | 0.094   |
| 14  | SDWN       | 117         | 7.286 | 1.92     | 1.38 | 0.45     | −0.55    | 4.7   | 10.5  | 5.8   | 0.001   |
| 15  | RDWL       | 117         | 2.023 | 1.28     | 1.13 | 1.61     | 3.46     | 0.6   | 6.9   | 6.3   | 0.000   |
| 16  | RDWN       | 117         | 2.614 | 1.05     | 1.02 | 0.41     | −0.50    | 0.8   | 5.2   | 4.4   | 0.006   |

Plant height under normal nitrogen cultivation (PHN), tiller number under low nitrogen availability (TNL), tiller number under normal nitrogen availability (TNN), culm length under low nitrogen level (CLL), culm length under normal nitrogen level (CLN), panicle length under normal nitrogen cultivation (PLN), panicle number under low nitrogen level (PNL), panicle number under normal nitrogen cultivation (PNN), root length under low nitrogen level (RLL), shoot dry weight under normal nitrogen cultivation (SDWN), and root dry weight under normal nitrogen cultivation. S.E : standard error. *P*-value: *p*-value of the W-test (the Shapiro Wilk W-statistic for the test of normality).

**Table S4.** List of candidate genes located within the *qTNN4-1*

| Gene locus | Annotation                                                                                                                                                                                                        | Molecular function                                           | Biological process                                                                                                                     | Cellular component |
|------------|-------------------------------------------------------------------------------------------------------------------------------------------------------------------------------------------------------------------|--------------------------------------------------------------|----------------------------------------------------------------------------------------------------------------------------------------|--------------------|
| Os04g54474 | Basic leucine zipper (bZIP) family protein; TGAL6                                                                                                                                                                 | Transcription factor activity, sequence-specific DNA binding | Regulation of transcription, DNA-templated; defense response to bacterium; response to cold                                            | Nucleus            |
| Os04g54680 | ULP1 protease family protein, putative, expressed ;paralog to LOC_Os01g02250 RGA-1, putative                                                                                                                      |                                                              |                                                                                                                                        |                    |
| Os04g54790 | ELMO/CED-12 family protein, putative, expressed                                                                                                                                                                   | Nucleotide binding; kinase activity                          | Protein Modification process                                                                                                           | Plastid            |
| Os04g54800 | Shikimate kinase, putative, expressed                                                                                                                                                                             | Kinase activity                                              | Metabolic process                                                                                                                      | Plastid            |
| Os04g54930 | ABC transporter, ATP-binding protein, putative, expressed                                                                                                                                                         | Transporter activity;hydrolase activity;protein binding      | Response to endogenous stimulus; response to abiotic stimulus;tropism; post-embryonic development;multicellular organismal development |                    |
| Os04g55070 | Gibberellin 20 oxidase 2, putative, expressed                                                                                                                                                                     | Catalytic activity                                           |                                                                                                                                        |                    |
| Os04g55090 | Pentatricopeptide repeat (PPR repeat) domain containing protein, putative, expressed; maturation of RBL1                                                                                                          |                                                              |                                                                                                                                        |                    |
| Os04g55360 | Ubiquitin carboxyl-terminal hydrolase domain containing protein, expressed                                                                                                                                        | Hydrolase activity;binding                                   | Protein metabolic process                                                                                                              |                    |
| Os04g55420 | Leucine-rich repeat family protein, putative, expressed                                                                                                                                                           |                                                              | Signal transduction                                                                                                                    |                    |
| Os04g55480 | BRCA1-associated protein, putative, expressed; BRCA1 is a human tumor suppressor gene (also known as a caretaker gene) and is responsible for repairing DNA. BRCA1 and BRCA2 are unrelated proteins, but both are | Catalytic activity                                           | Protein modification process                                                                                                           |                    |
| Os04g55410 | FGGY family of carbohydrate kinases, putative, expressed                                                                                                                                                          | Kinase activity                                              | Carbohydrate metabolic process;response to biotic stimulus;response to abiotic stimulus                                                | Cytosol            |
| Os04g55420 | Leucine-rich repeat family protein, putative, expressed                                                                                                                                                           |                                                              | Signal transduction                                                                                                                    |                    |
| Os04g55480 | BRCA1-associated protein, putative, expressed                                                                                                                                                                     | Catalytic activity                                           | Protein modification process;post-embryonic development                                                                                | Intracellular      |
| Os04g55510 | Zinc finger, C3HC4 type domain containing protein, expressed                                                                                                                                                      | Binding                                                      |                                                                                                                                        |                    |
| Os04g55520 | AP2 domain containing protein, expressed                                                                                                                                                                          | Sequence-specific DNA binding transcription factor activity  | Biosynthetic process                                                                                                                   | Nucleus            |
| Os04g55560 | AP2 domain containing protein, expressed                                                                                                                                                                          | Sequence-specific DNA binding transcription factor activity  | Cell differentiation;anatomical structure morphogenesis;reproduction;multicellular organismal development                              |                    |
| Os04g55640 | Plant-specific domain TIGR01627 family protein, expressed                                                                                                                                                         |                                                              | Carbohydrate metabolic process                                                                                                         | Golgi apparatus    |
| Os04g55680 | Indole-3-acetate beta-glucosyltransferase, putative, expressed                                                                                                                                                    | Transferase activity                                         | Metabolic process                                                                                                                      |                    |
| Os04g55730 | Alpha-N-acetylglucosaminidase, putative, expressed                                                                                                                                                                | Hydrolase activity                                           | Reproduction;post-embryonic development                                                                                                |                    |
| Os04g55750 | OsWAK54 - OsWAK short gene, expressed                                                                                                                                                                             | Kinase activity;nucleotide binding                           | Anatomical structure morphogenesis;cell growth;carbohydrate metabolic process;cellular homeostasis                                     |                    |
| Os04g55760 | OsWAK55 - OsWAK receptor-like protein kinase, expressed                                                                                                                                                           | Kinase activity                                              | Protein modification process                                                                                                           | Plasma membrane    |
| Os04g55940 | Sodium/calcium exchanger protein, putative, expressed                                                                                                                                                             | Transporter activity                                         | Transport                                                                                                                              | Membrane;vacuole   |
| Os04g55970 | AP2-like ethylene-responsive transcription factor AINTEGUMENTA, putative, expressed                                                                                                                               | Sequence-specific DNA binding transcription factor activity  | Anatomical structure morphogenesis;multicellular organismal development                                                                | Nucleus            |
| Os04g56360 | Cysteine-rich receptor-like protein kinase 8 precursor, putative, expressed                                                                                                                                       | Kinase activity                                              | Protein modification process                                                                                                           | Plasma membrane    |
